# Supplementary material for: Microfluidic-assisted silk nanoparticle tuning
Source: PubMed Central journal article supplement (PMC9473249; doi:10.1039/c8na00208h), 2018-11-30
Supplement: NA-001-C8NA00208H-s001.pdf [file NA-001-C8NA00208H-s001.pdf]

## Supporting Information

### Microfluidic-assisted silk nanoparticle tuning

*Thidarat Wongpinyochit<sup>1</sup>, John D. Totten<sup>1</sup>, Blair F. Johnston<sup>1</sup>, F. Philipp Seib<sup>1,2,\*</sup>*

<sup>1</sup> Strathclyde Institute of Pharmacy and Biomedical Sciences, University of Strathclyde, 161 Cathedral Street, Glasgow, G4 0RE, UK. E-mail: philipp.seib@strath.ac.uk

<sup>2</sup> Leibniz Institute of Polymer Research Dresden, Max Bergmann Center of Biomaterials Dresden, Hohe Strasse 6, 01069 Dresden, Germany

\* Corresponding author: Tel. +44 (0) 141 548 2510, E-mail: philipp.seib@strath.ac.uk or philipp.seib@SeibLab.com

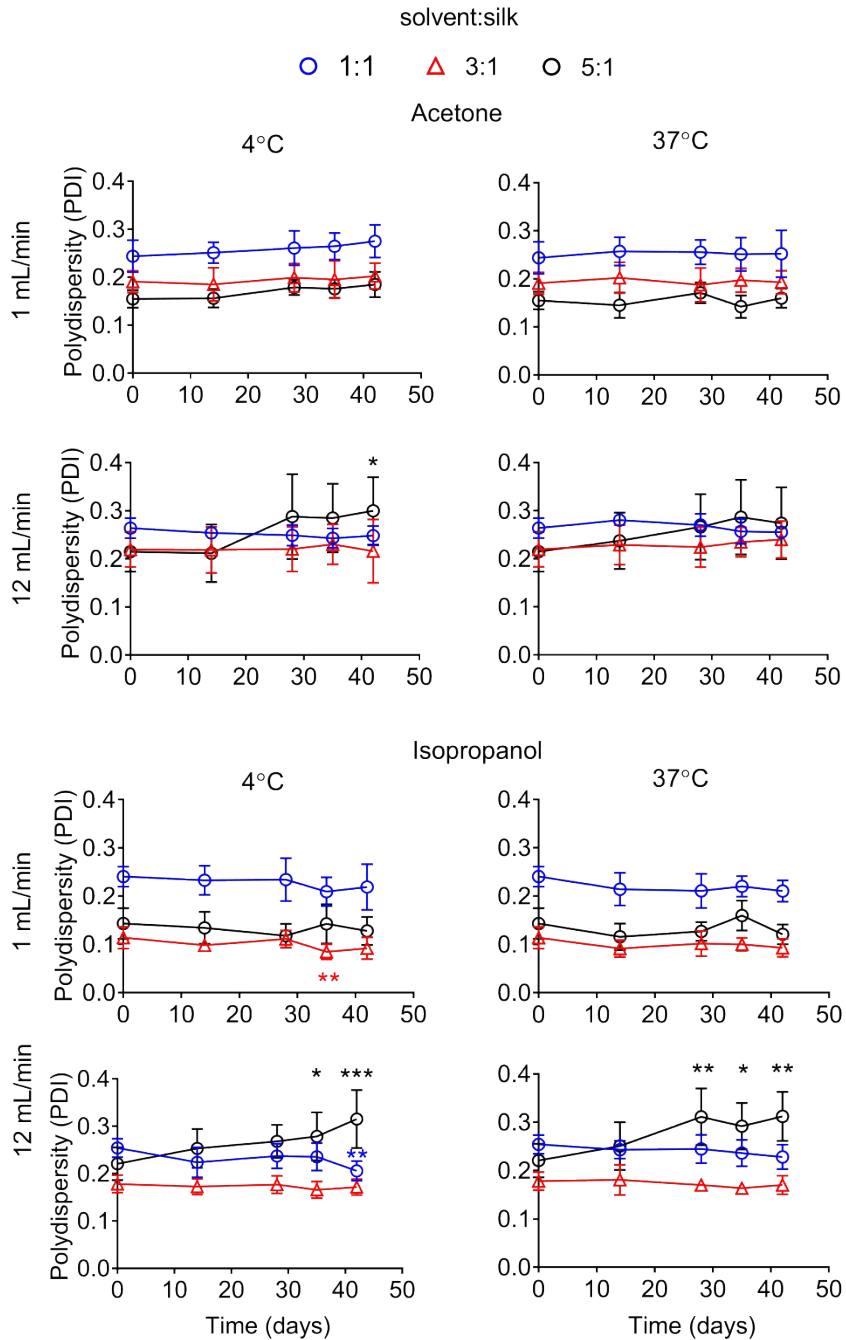

**Figure S1** Stability of silk nanoparticles manufactured with a microfluidic-based method by varying solvents, the total flow rate and the total flow rate ratio. Polydispersity (PDI) of silk nanoparticles in water at 4°C and 37°C was measured at day 0, 14, 28, 35 and 42. One-way ANOVA followed by Bonferroni's multiple comparison post hoc test, \*P < 0.05, \*\*P < 0.01, \*\*\* P < 0.001. Error bars are hidden in the plot -symbol when not visible,  $\pm$ SD, n = 3.

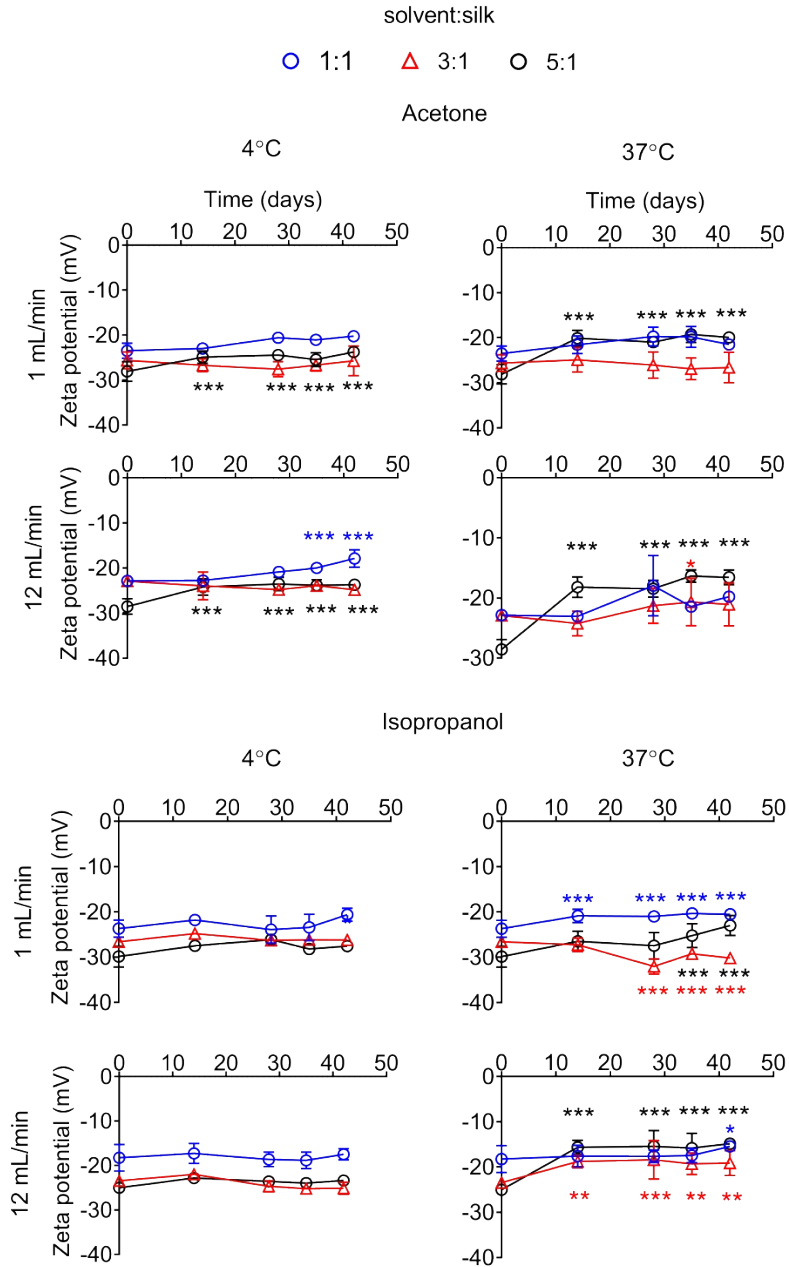

**Figure S2** Stability of silk nanoparticles manufactured with a microfluidic-based method by varying solvents, the total flow rate and the total flow rate ratio. Zeta potential of silk nanoparticles in water at 4°C and 37°C was measured at day 0, 14, 28, 35 and 42. One-way ANOVA followed by Bonferroni's multiple comparison post hoc test, \*P < 0.05, \*\*P < 0.01, \*\*\* P < 0.001. Error bars are hidden in the plot -symbol when not visible, ±SD, n = 3.
